# Supplementary material for: Monophasic Variant of Salmonella Typhimurium 4,[5],12:i:- (ACSSuGmTmpSxt Type) Outbreak in Central Italy Linked to the Consumption of a Roasted Pork Product (Porchetta)
Source: MDPI journal article supplement (doi:10.3390/microorganisms11102567), 2023-10-15
Supplement: s1 [file s1]

Table S1: Total number (n=25) of food (n=2) and environmental (n=23) samples at RS(A) (n=10), RS(B) (n=6) and FPP (n=9); \*(FCS): surface in contact with food, \*\*(NFCS): surface not in contact with food.

| Sampling dates | Sampling place | Sample detail                               | Origin sampling                                               | Salmonella result |
|----------------|----------------|---------------------------------------------|---------------------------------------------------------------|-------------------|
| 17 August      | RS(A)          | Sponge swab on unsanitized surface (NFCS)** | Anteroom access door handle                                   | Negative          |
| 17 August      | RS(A)          | Sponge swab on unsanitized surface (FCS)*   | “Porchetta” knife                                             | Negative          |
| 17 August      | RS(A)          | Sponge swab on unsanitized surface (FCS)*   | “Porchetta” picking scoop                                     | Negative          |
| 17 August      | RS(A)          | Sponge swab on unsanitized surface (FCS)*   | Teflon chopping board for supporting and cutting “porchetta”  | Positive          |
| 17 August      | RS(A)          | Sponge swab on unsanitized surface (FCS)*   | Teflon cutting board from the butcher’s                       | Negative          |
| 17 August      | RS(A)          | Sponge swab on unsanitized surface (FCS)*   | Teflon worktop in butcher’s                                   | Negative          |
| 17 August      | RS(A)          | Sponge swab on unsanitized surface (FCS)*   | Teflon cutting board for white meat counter                   | Positive          |
| 17 August      | RS(A)          | Sponge swab on unsanitized surface (NFCS)*  | Fresh meat area scale keyboard                                | Negative          |
| 17 August      | RS(A)          | Sponge swab on unsanitized surface (FCS)*   | Fresh meat slicer                                             | Negative          |
| 17 August      | RS(A)          | Sponge swab on unsanitized surface (FCS)*   | Teflon cutting board behind the counter                       | Negative          |
| 23 August      | RS(B)          | Ready-to-eat food                           | “Porchetta”                                                   | Positive          |
| 23 August      | RS(B)          | Sponge swab on unsanitized surface (FCS)*   | Wooden chopping board for “porchetta”                         | Positive          |
| 23 August      | RS(B)          | Sponge swab on unsanitized surface (FCS)*   | “Porchetta” knife                                             | Positive          |
| 23 August      | RS(B)          | Sponge swab on unsanitized surface (FCS)*   | “Porchetta” spatula                                           | Negative          |
| 23 August      | RS(B)          | Sponge swab on unsanitized surface (FCS)*   | Teflon cutting board to the right of the wooden cutting board | Negative          |
| 23 August      | RS(B)          | Sponge swab on unsanitized surface (FCS)*   | Steel table to the left of the wooden chopping board          | Negative          |
| 24 August      | FPP            | Ready-to-eat food                           | “Porchetta”                                                   | Negative          |
| 24 August      | FPP            | Sponge swab on unsanitized surface (FCS)*   | Knife                                                         | Negative          |
| 24 August      | FPP            | Sponge swab on unsanitized surface (FCS)*   | Refrigerator grill                                            | Negative          |

|           |     |                                             |                                           |          |
|-----------|-----|---------------------------------------------|-------------------------------------------|----------|
| 24 August | FPP | Sponge swab on unsanitized surface (NFCS)*  | Refrigerator wall                         | Negative |
| 24 August | FPP | Sponge swab on unsanitized surface (FCS)*   | Transporting board for cooked "porchetta" | Positive |
| 24 August | FPP | Sponge swab on unsanitized surface (NFCS)** | Refrigerator bottom                       | Negative |
| 24 August | FPP | Sponge swab on unsanitized surface (NFCS)** | Refrigerator handle                       | Negative |
| 24 August | FPP | Sponge swab on sanitized surface (FCS)*     | Raw "porchetta" manipulating table        | Negative |
| 24 August | FPP | Sponge swab on sanitized surface (FCS)*     | Knife                                     | Negative |

---
